# Supplementary material
Source: PubMed Central journal article supplement (PMC365755)

**A)**

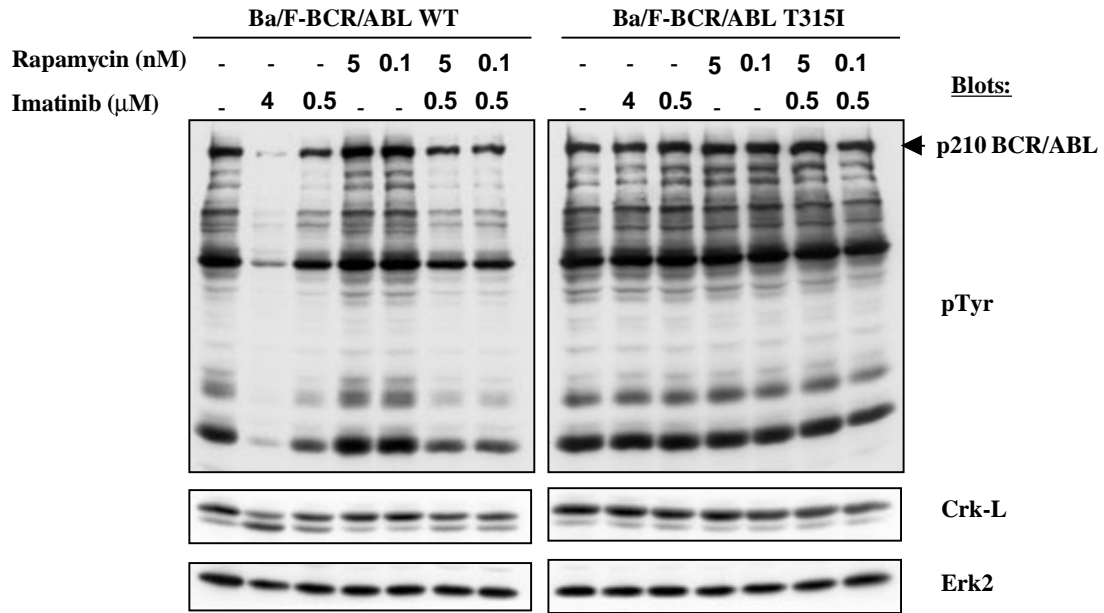

**B)**

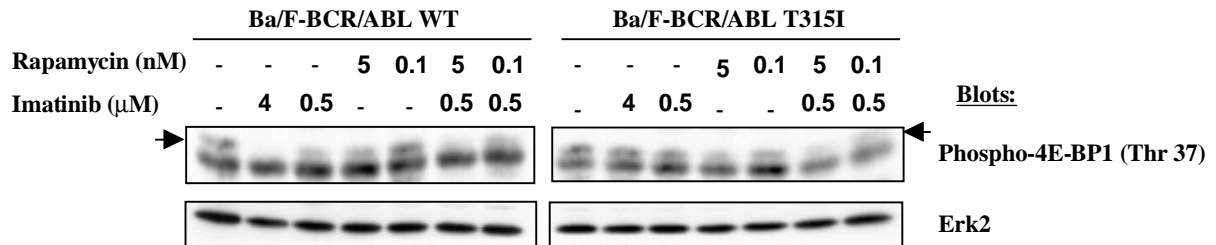

Supplement: pnas_101_9_3130__2.pdf [file pnas_101_9_3130__2.pdf]

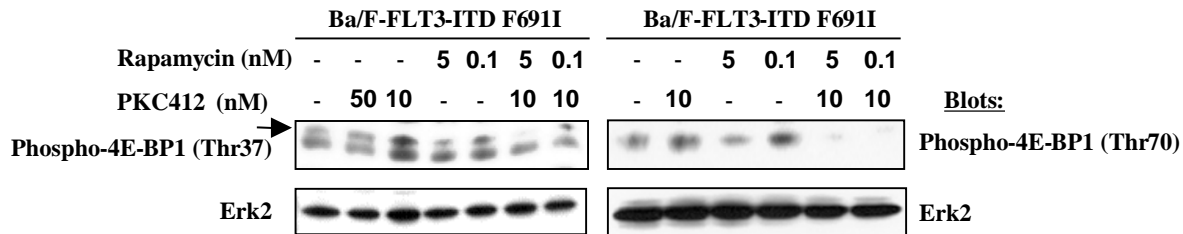

Supplement: pnas_101_9_3130__4.pdf [file pnas_101_9_3130__4.pdf]
